# Supplementary material
Source: publisher figshare collection journal article supplement (https://acs.figshare.com/ndownloader/files/14916188)
Supplement: Supplementary file 1 [file 14916188]

## Supporting Information

### Development of Durable, Fluorine-free and Transparent Superhydrophobic Surfaces for Oil/water Separation

*Chaolang Chen, Ding Weng, Shuai Chen, Awais Mahmood, Jiadao Wang\**

Sate Key Laboratory of Tribology, Tsinghua University, Beijing 100084, P.R. China

E-mail: jdwang@mail.tsinghua.edu.cn.

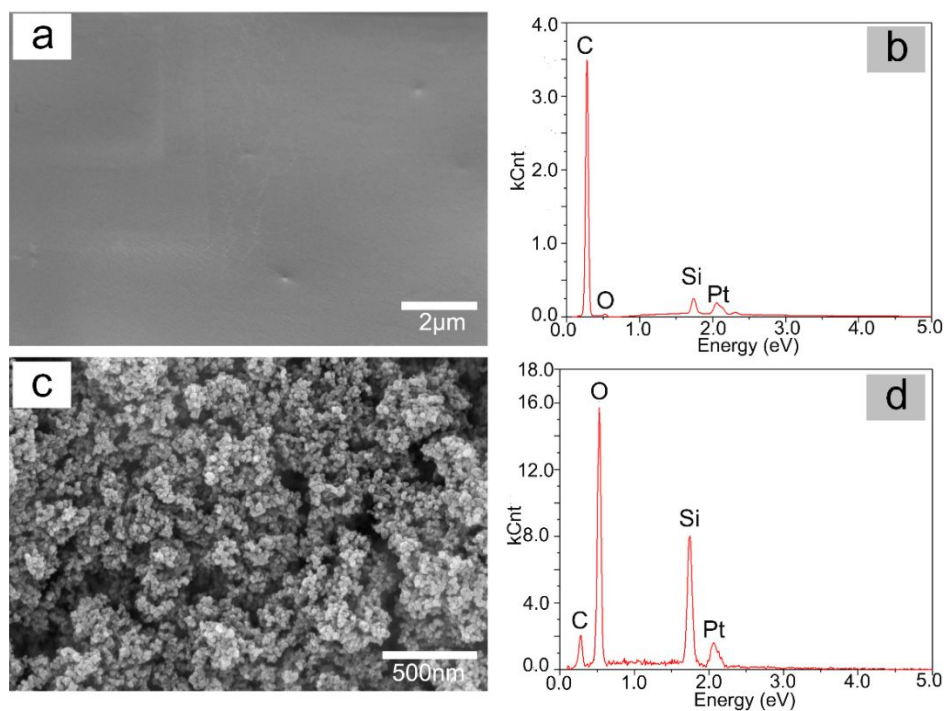

**Figure S1.** (a, b) The SEM image and EDX analysis of Super 75 located on the silicon wafer. (c, d) The SEM image and EDX analysis of hydrophobic SiO<sub>2</sub> nanoparticles (AEROSIL R972) located on the silicon wafer.

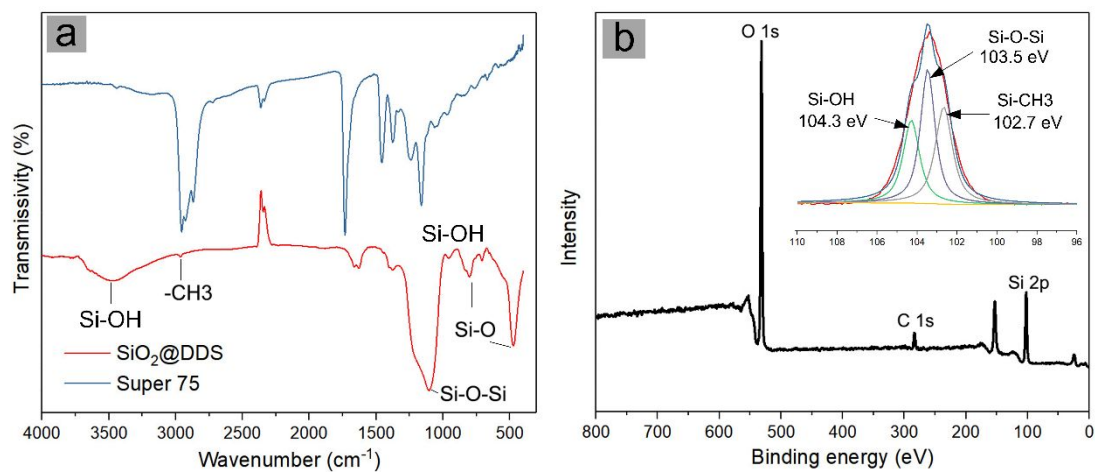

**Figure S2.** (a) FTIR spectra of Super 75 and hydrophobic SiO<sub>2</sub> nanoparticles. (b) XPS spectrum of as-prepared coating and the inset is XPS high resolution spectrum of Si 2p.

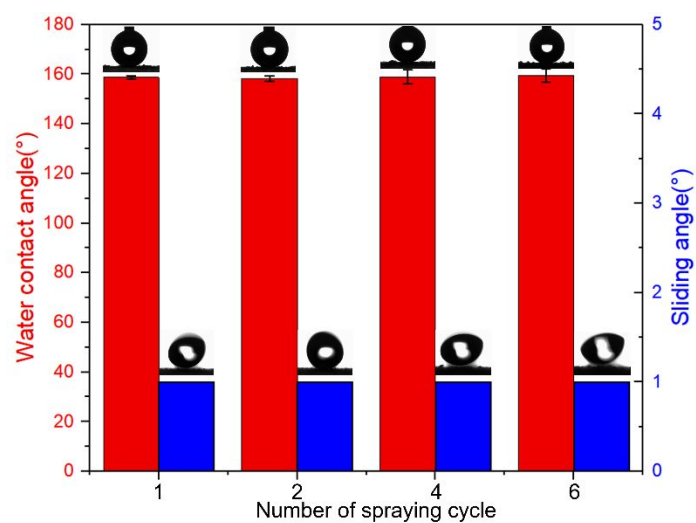

**Figure S3.** The water contact angle and sliding angle of coated glass slides with different spraying cycles.

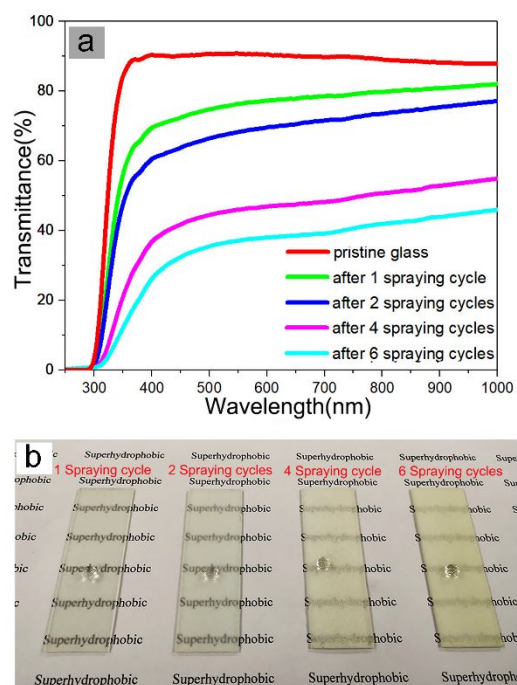

**Figure S4.** The (a) transmittance curves and (b) optical images of coated glass slides with different spraying cycles.

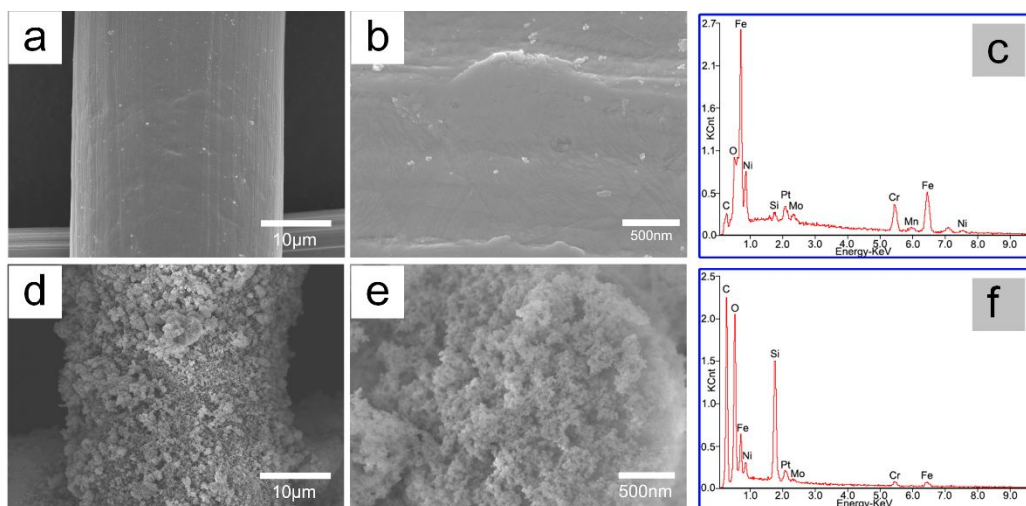

**Figure S5.** The SEM images of (a, b) pristine mesh and (d, e) coated mesh. The EDX measurements of (c) pristine and (f) coated mesh.

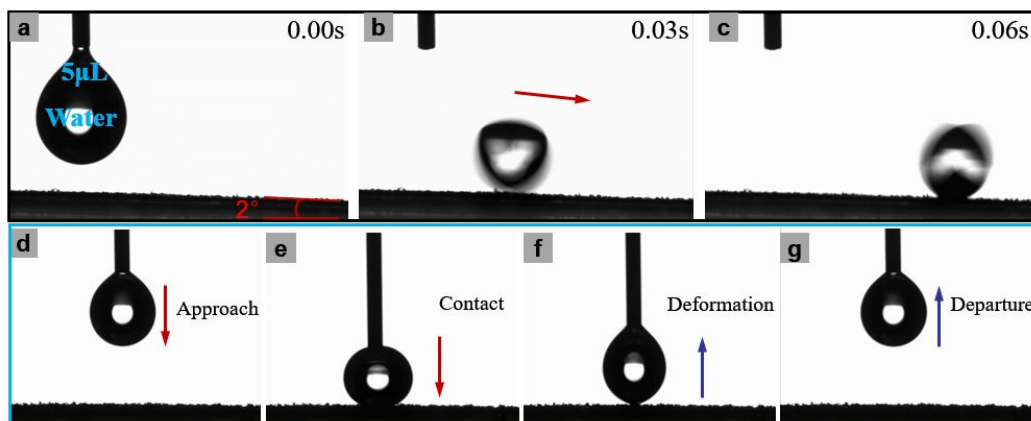

**Figure S6.** (a-c) Water droplet rolling on the as-prepared mesh surface with a tilted angle of  $\sim 2^\circ$ .

(d-g) Water droplet making contact and losing contact with the as-prepared mesh surface.

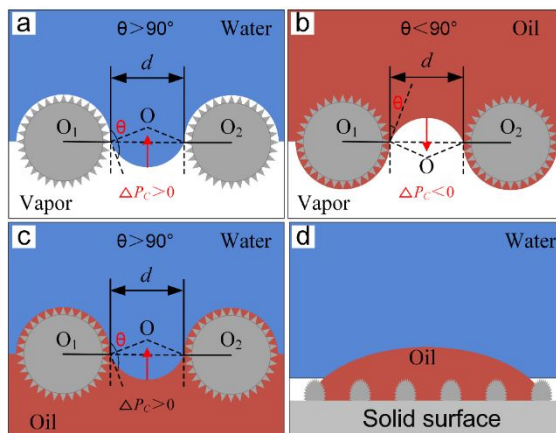

**Figure S7.** Schematic of separation mechanism of as-prepared porous superhydrophobic and superoleophilic materials. (a) The water cannot spontaneously permeate through the surface due to superhydrophobicity ( $\Delta P_c > 0$ ). (b) The oil can spontaneously pass through the surface due to superoleophilicity ( $\Delta P_c < 0$ ). (c) The water cannot spontaneously permeate through the surface that immersed in oil due to underoil superhydrophobicity ( $\Delta P_c > 0$ ). (d) The oil can spontaneously pass through the surface that immersed in water due to underwater superoleophilicity.
